# Supplementary material for: Protection of specific maternal messenger RNAs by the P body protein CGH-1 (Dhh1/RCK) during Caenorhabditis elegans oogenesis
Source: PubMed Central journal article supplement — J Cell Biol. 2008 Aug 11;182(3):543–57. doi: 10.1083/jcb.200801183 (PMC2500139; doi:10.1083/jcb.200801183), 2008-08-11
Supplement: jcb.200801183_4.pdf [file jcb.200801183_4.pdf]

Table S1. **Brood size analysis of WT, *patr-1(tm2402)*, and *dcap-2(tm2470)* hermaphrodites**

| <b>PO genotype</b>                                                  | <b>Mean brood size<sup>c</sup></b> | <b>p-values<sup>d</sup></b> | <b>F1 embryonic lethality</b> | <b>F1 larval arrest<sup>e</sup></b> |
|---------------------------------------------------------------------|------------------------------------|-----------------------------|-------------------------------|-------------------------------------|
|                                                                     |                                    |                             | %                             | %                                   |
| N2                                                                  | 284.4 ± 32.7                       |                             |                               |                                     |
| <i>patr-1(tm2402)</i> (LD1105) <sup>a</sup>                         | 52 ± 33.7                          | 3.03 × 10 <sup>-5</sup>     | 65 (169/260)                  | 100 (91/91)                         |
| <i>patr-1(tm2402)</i> (LD1106) <sup>a</sup>                         | 55 ± 17.3                          | 2.51 × 10 <sup>-4</sup>     | 60.1 (179/298)                | 98.3 (117/119)                      |
| <i>patr-1(tm2402)</i> (LD1106) × ♂ <i>fog-2(q71)</i> <sup>a,b</sup> | 44.6 ± 11.9                        | 1.23 × 10 <sup>-4</sup>     | 0                             | 0 (0/223)                           |
| <i>dcap-2(tm2470)</i> (LD1101)                                      | 57.2 ± 30.0                        | 5.34 × 10 <sup>-4</sup>     | 1.1 (3/283)                   |                                     |
| <i>dcap-2(tm2470)</i> (LD1102)                                      | 80 ± 25.3                          | 1.83 × 10 <sup>-5</sup>     | 1.3 (5/400)                   |                                     |
| <i>dcap-2(tm2470)</i> (LD1103)                                      | 73.8 ± 29.2                        | 3.47 × 10 <sup>-4</sup>     | 2.2 (8/369)                   |                                     |

Analysis was conducted on backcrossed *patr-1(tm2402)* and *dcap-2(tm2470)* lines (strain designations are in parentheses). Numbers of embryos or larvae scored are shown in parentheses.

<sup>a</sup>Homozygotes were derived from heterozygous mothers and therefore received maternally supplied *patr-1* but produce embryos that lack maternal *patr-1*.

<sup>b</sup>Zygotic *patr-1* contribution is provided by the male.

<sup>c</sup>Mean brood size ± standard deviation was calculated from five replicates.

<sup>d</sup>p-values for mean brood size compared to N2.

<sup>e</sup>Percentage of hatched embryos that subsequently arrested at the L1 or L2 stage.
